# Supplementary material for: Altered Fecal Microbiotas and Organic Acid Concentrations Indicate Possible Gut Dysbiosis in University Rugby Players: An Observational Study
Source: MDPI journal article supplement (doi:10.3390/microorganisms9081687), 2021-08-09
Supplement: s1 [file s1]

**Supplementary Table S1.** Alpha diversity indices of the microbiotas in fecal samples from university rugby players

| Index   | FWs    |         | BKs    |         | P-value |
|---------|--------|---------|--------|---------|---------|
| Chao1   | 161.18 | ± 47.78 | 169.91 | ± 48.11 | 0.36    |
| Shannon | 4.54   | ± 0.50  | 4.52   | ± 0.55  | 0.79    |

Team positions: FWs, forwards.; BKs, backs

Significance (\* $P < 0.05$  and \*\* $P < 0.01$ ) was analyzed using the Welch's t-test.

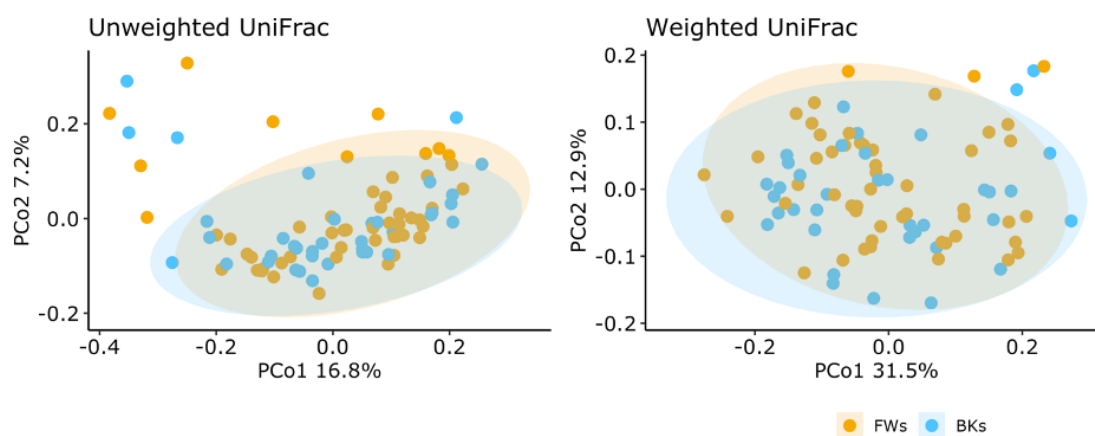

**Supplementary Figure S1.** PCoA analysis of the microbiotas in fecal samples from university rugby players, based on unweighted and weighted UniFrac distances. Ellipses enclosing clusters indicate 95% confidence interval. Significance was analyzed by PERMANOVA. Team positions: FWs, Forwards; BKs, Backs

**Supplementary Table S2.** Bacterial genera that differed in fecal samples of the control and URP groups (average abundance < 0.1%)

| Taxonomy           |                            |                        | Control |   |       | URP    |   |       | P-value |    |
|--------------------|----------------------------|------------------------|---------|---|-------|--------|---|-------|---------|----|
| Order              | Family                     | Genus                  |         |   |       |        |   |       |         |    |
| Clostridiales      | <i>Lachnospiraceae</i>     | Unclassified           | 0.092   | ± | 0.132 | 0.083  | ± | 0.243 | 0.028   | *  |
| Erysipelotrichales | <i>Erysipelotrichaceae</i> | <i>Coprobacillus</i>   | 0.097   | ± | 0.167 | 0.051  | ± | 0.194 | 0.003   | ** |
| Bacteroidales      | S24-7                      | Unclassified           | 0.034   | ± | 0.077 | 0.102  | ± | 0.677 | <0.001  | ** |
| Clostridiales      | <i>Christensenellaceae</i> | Unclassified           | 0.082   | ± | 0.239 | 0.039  | ± | 0.235 | 0.001   | ** |
| Clostridiales      | Unclassified               | Unclassified           | 0.022   | ± | 0.044 | 0.073  | ± | 0.103 | 0.028   | *  |
| Bacillales         | <i>Bacillaceae</i>         | <i>Bacillus</i>        | 0.004   | ± | 0.009 | 0.080  | ± | 0.158 | 0.029   | *  |
| Clostridiales      | <i>Lachnospiraceae</i>     | <i>Defluviitalea</i>   | 0.065   | ± | 0.096 | 0.016  | ± | 0.042 | 0.003   | ** |
| Pasteurellales     | <i>Pasteurellaceae</i>     | <i>Aggregatibacter</i> | 0.002   | ± | 0.007 | 0.062  | ± | 0.207 | 0.016   | *  |
| Enterobacteriales  | <i>Enterobacteriaceae</i>  | <i>Citrobacter</i>     | 0.004   | ± | 0.014 | 0.057  | ± | 0.217 | 0.021   | *  |
| Lactobacillales    | <i>Streptococcaceae</i>    | <i>Lactococcus</i>     | 0.003   | ± | 0.011 | 0.053  | ± | 0.300 | 0.006   | ** |
| Actinomycetales    | <i>Micrococcaceae</i>      | <i>Rothia</i>          | 0.012   | ± | 0.023 | 0.044  | ± | 0.089 | 0.005   | ** |
| Clostridiales      | <i>Ruminococcaceae</i>     | <i>Anaerotruncus</i>   | 0.040   | ± | 0.062 | 0.008  | ± | 0.019 | <0.001  | ** |
| Lactobacillales    | <i>Carnobacteriaceae</i>   | <i>Granulicatella</i>  | 0.007   | ± | 0.006 | 0.030  | ± | 0.054 | 0.007   | ** |
| Lactobacillales    | <i>Lactobacillaceae</i>    | <i>Pediococcus</i>     | 0.015   | ± | 0.060 | 0.019  | ± | 0.164 | 0.040   | *  |
| Erysipelotrichales | <i>Erysipelotrichaceae</i> | cc_115                 | 0.010   | ± | 0.017 | 0.002  | ± | 0.005 | <0.001  | ** |
| Bacteroidales      | <i>Rikenellaceae</i>       | <i>Rikenella</i>       | 0.010   | ± | 0.031 | <0.001 |   |       | 0.002   | ** |
| Streptophyta       | Unclassified               | Unclassified           | 0.001   | ± | 0.002 | 0.007  | ± | 0.025 | 0.033   | *  |
| Clostridiales      | <i>Peptococcaceae</i>      | rc4-4                  | 0.005   | ± | 0.014 | 0.003  | ± | 0.019 | 0.038   | *  |
| Clostridiales      | <i>Christensenellaceae</i> | <i>Christensenella</i> | 0.006   | ± | 0.012 | 0.001  | ± | 0.004 | 0.005   | ** |
| Clostridiales      | <i>Christensenellaceae</i> | Unclassified           | 0.005   | ± | 0.010 | 0.001  | ± | 0.003 | 0.001   | ** |
| Clostridiales      | <i>Eubacteriaceae</i>      | <i>Anaerofustis</i>    | 0.003   | ± | 0.004 | 0.001  | ± | 0.004 | 0.005   | ** |
| Clostridiales      | <i>Dehalobacteriaceae</i>  | <i>Dehalobacterium</i> | 0.003   | ± | 0.009 | 0.001  | ± | 0.006 | 0.030   | *  |
| Actinomycetales    | <i>Corynebacteriaceae</i>  | <i>Corynebacterium</i> | 0.003   | ± | 0.009 | 0.001  | ± | 0.009 | 0.036   | *  |
| Pseudomonadales    | <i>Moraxellaceae</i>       | <i>Acinetobacter</i>   | 0.003   | ± | 0.006 | <0.001 |   |       | <0.001  | ** |
| Sphingomonadales   | <i>Sphingomonadaceae</i>   | <i>Sphingomonas</i>    | <0.001  |   |       | 0.003  | ± | 0.004 | <0.001  | ** |
| Bacteroidales      | <i>Porphyromonadaceae</i>  | <i>Dysgonomonas</i>    | 0.002   | ± | 0.007 | <0.001 |   |       | 0.033   | *  |
| Deferribacteriales | <i>Deferribacteraceae</i>  | <i>Mucispirillum</i>   | 0.001   | ± | 0.003 | <0.001 |   |       | <0.001  | ** |
| Clostridiales      | [ <i>Tissierellaceae</i> ] | WAL_1855D              | 0.001   | ± | 0.002 | 0.000  | ± | 0.003 | <0.001  | ** |
| Campylobacteriales | <i>Helicobacteraceae</i>   | <i>Flexispira</i>      | <0.001  |   |       | 0.001  | ± | 0.002 | 0.023   | *  |
| Campylobacteriales | <i>Helicobacteraceae</i>   | Unclassified           | <0.001  |   |       | 0.001  | ± | 0.002 | 0.047   | *  |
| Bacteroidales      | Unclassified               | Unclassified           | 0.000   | ± | 0.002 | <0.001 |   |       | 0.033   | *  |
| Pseudomonadales    | <i>Moraxellaceae</i>       | <i>Enhydrobacter</i>   | 0.000   | ± | 0.001 | <0.001 |   |       | 0.033   | *  |

Genera with relative abundances lower than 0.1% and having significant differences between groups are listed. Significance (\* $P$ <0.05 and \*\* $P$ <0.01) was analyzed using the Wilcoxon rank sum test.
